# Supplementary material for: The Probiotic Strain H. alvei HA4597® Improves Weight Loss in Overweight Subjects under Moderate Hypocaloric Diet: A Proof-of-Concept, Multicenter Randomized, Double-Blind Placebo-Controlled Study
Source: MDPI journal article supplement (doi:10.3390/nu13061902), 2021-06-01
Supplement: s1 [file s1]

**Table S1.** Changes in Body composition assessments among groups

| Characteristics             | Total     | <u>ITT</u><br>HA<br>group | P group   | p     | Total     | <u>PP</u><br>HA<br>group | P group   | p     |
|-----------------------------|-----------|---------------------------|-----------|-------|-----------|--------------------------|-----------|-------|
| Lean mass at 0w [Kg]        | 56.4±11.8 | 57.0±12.5                 | 55.9±11.1 | 0.634 | 56.5±11.9 | 56.9±12.6                | 56.1±11.2 | 0.774 |
| Lean mass at 12w [Kg]       | 56.0±11.6 | 56.6±12.5                 | 55.3±10.7 | 0.636 | 56.0±11.7 | 56.5±12.6                | 55.5±10.8 | 0.749 |
| Fat mass at 0w [kg]         | 26.1±5.6  | 25.9±5.2                  | 26.3±5.9  | 0.615 | 26.0±5.5  | 25.8±5.2                 | 26.1±5.8  | 0.772 |
| Fat mass at 12w [Kg]        | 24.0±5.9  | 23.5±5.6                  | 24.4±6.2  | 0.268 | 23.8±5.9  | 23.4±5.6                 | 24.1±6.1  | 0.337 |
| Lean/Fat mass ratio at 0w   | 2.31±0.86 | 2.35±0.89                 | 2.27±0.82 | 0.482 | 2.32±0.85 | 2.35±0.88                | 2.30±0.83 | 0.606 |
| Lean/ Fat mass ratio at 12w | 2.54±1.00 | 2.60±1.02                 | 2.47±0.97 | 0.291 | 2.56±1.00 | 2.62±1.03                | 2.51±0.98 | 0.377 |

Intention to treat, ITT; Per protocol, PP; H alvei HA4597®, HA; P, Placebo; p, Exact Mann-Whitney U test p value.
